# Supplementary material for: High performance bifunctional electrocatalytic activity of a reduced graphene oxide–molybdenum oxide hybrid catalyst
Source: Royal Society of Chemistry journal article supplement (doi:10.1039/c6ta05043c), 2016-01-01
Supplement: c6ta05043c1.pdf [file c6ta05043c1.pdf]

## Supporting Information

### High performance bifunctional electrocatalytic activity of a reduced graphene oxide - molybdenum oxide hybrid catalyst

*Sundaram Chandrasekaran<sup>a</sup>, Eui Jung Kim<sup>a</sup>, Jin Suk Chung<sup>a</sup>, Chris R Bowen<sup>b</sup>,  
Balasubramanian Rajagopalan<sup>a</sup>, Vaia Adamaki<sup>b</sup>, R.D.K. Misra<sup>c</sup>, and Seung Hyun Hur<sup>\*a</sup>*

<sup>a</sup>School of Chemical Engineering, University of Ulsan, Daehak-ro, 102, Nam-gu, Ulsan 680-749,  
South Korea.

<sup>b</sup> Department of Mechanical Engineering, University of Bath, Bath, BA2, 7AY, U.K

<sup>c</sup> Department of Metallurgical, Materials and Biomedical Engineering, University of Texas at El Paso,  
TX, 79968-0521, USA

*\*corresponding author: [shhur@ulsan.ac.kr](mailto:shhur@ulsan.ac.kr)*

---

## 1. Electrochemical Measurements

### 1.1. RHE conversion

A saturated silver chloride electrode was used as the reference electrode in all measurements. The measured potentials versus Ag/AgCl reference electrode were converted to the reversible hydrogen electrode (RHE) scale via the Nernst equation:

$$E_{\text{RHE}} = E_{\text{Ag/AgCl}} + 0.241 \text{ V} + 0.0591 \times \text{pH at } 25 \text{ }^\circ\text{C} \quad (1)$$

### 1.2. Rotating disk electrode (RDE) measurement

The rotating disk electrode (RDE) measurement was carried out to study the kinetics of electrochemical catalytic ORR of the prepared catalyst. The electron transfer number per oxygen involved in the oxygen reduction currents was obtained and evaluated according to changes in the rotating speed of the RDE. The electron transfer number ( $n$ ) of all samples according to the slopes of the linear fitted using Koutecky-Levich (K-L) plot on the basis of K-L equation is given,

$$\frac{1}{J} = \frac{1}{J_L} + \frac{1}{J_K} = \frac{1}{B\omega^{0.5}} + \frac{1}{J_K} \quad (2)$$

$$B = 0.62nFC_o(D_o)^{\frac{2}{3}}\nu^{-\frac{1}{6}} \quad (3)$$

$$J_K = nFkC_o \quad (4)$$

For the Tafel plot, the kinetic current was calculated from the mass -transport correction of RDE by,

$$J_K = \frac{(J * J_L)}{(J_L - J)} \quad (5)$$

where  $J$ ,  $J_K$ , and  $J_L$  are the ORR, kinetic limiting, and diffusion limiting currents, respectively.  $F$  is the Faraday constant, and  $n$  is the electron transfer number per oxygen molecule involved in the ORR.  $\omega$  is the angular velocity of the disk.  $C_o$  and  $D_o$  are the bulk concentration of  $\text{O}_2$  and the diffusion coefficient of  $\text{O}_2$  in 0.1 M KOH, respectively, and  $\nu$  is the kinematic viscosity of 0.1 M KOH.

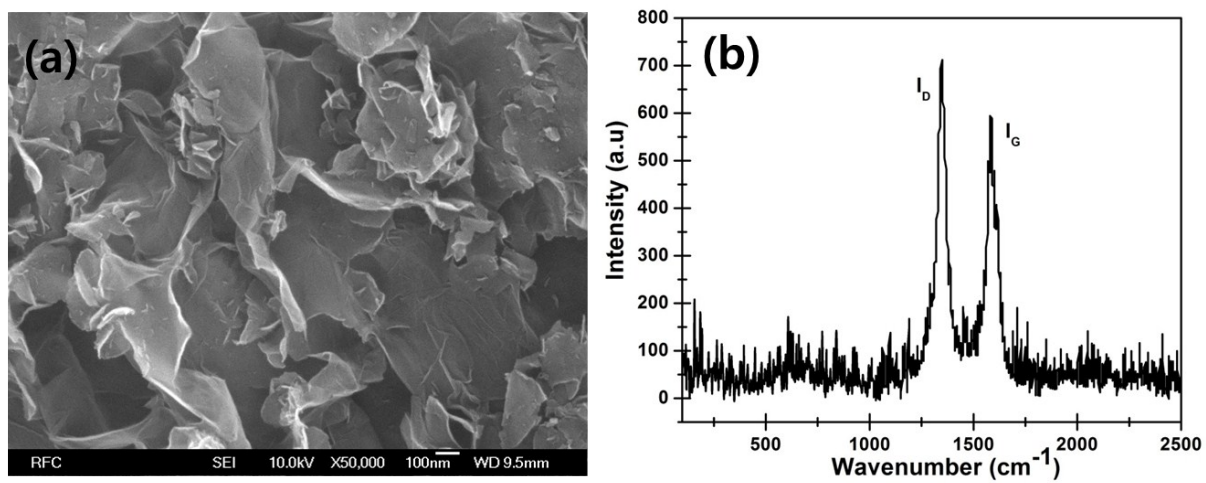

**Fig. S1** (a,) FE-SEM image and (c) Raman spectra of the pristine rGO

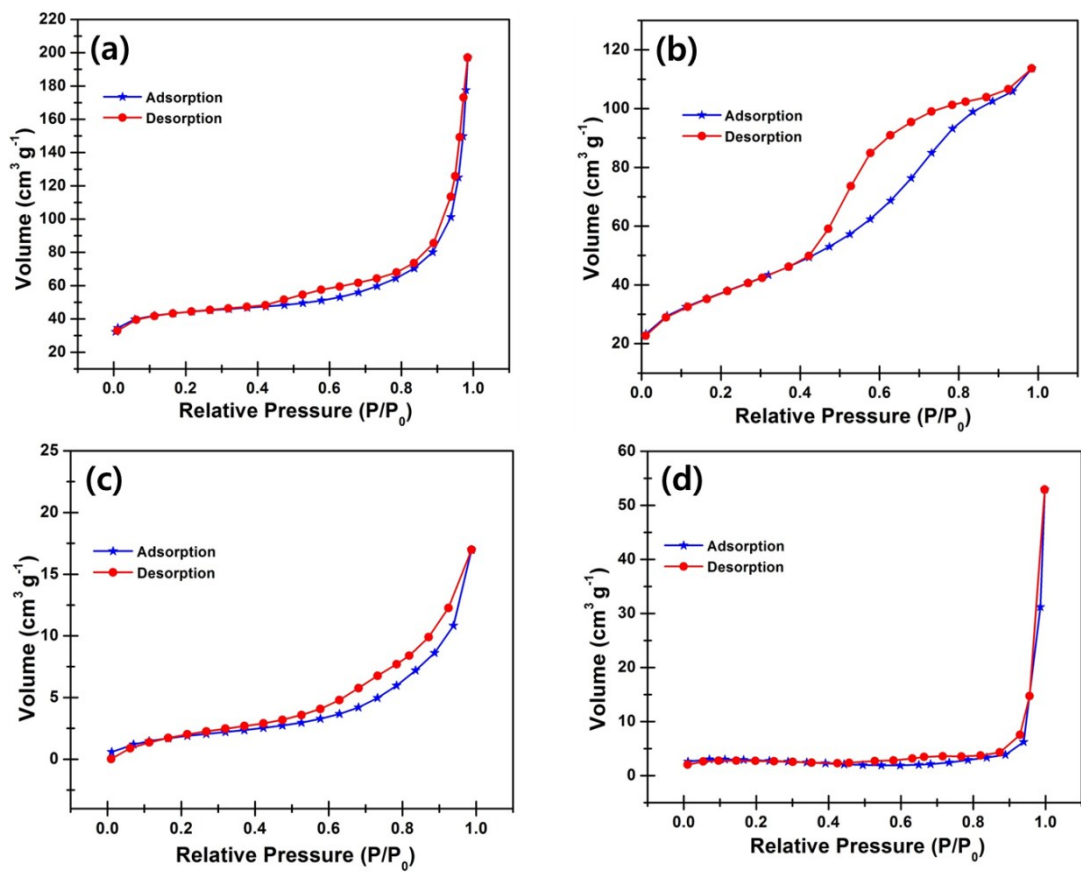

**Fig. S2** Nitrogen adsorption/desorption isotherms of (a) high quality Pt/C, (b) GMR, (c) MR and (d) MS samples

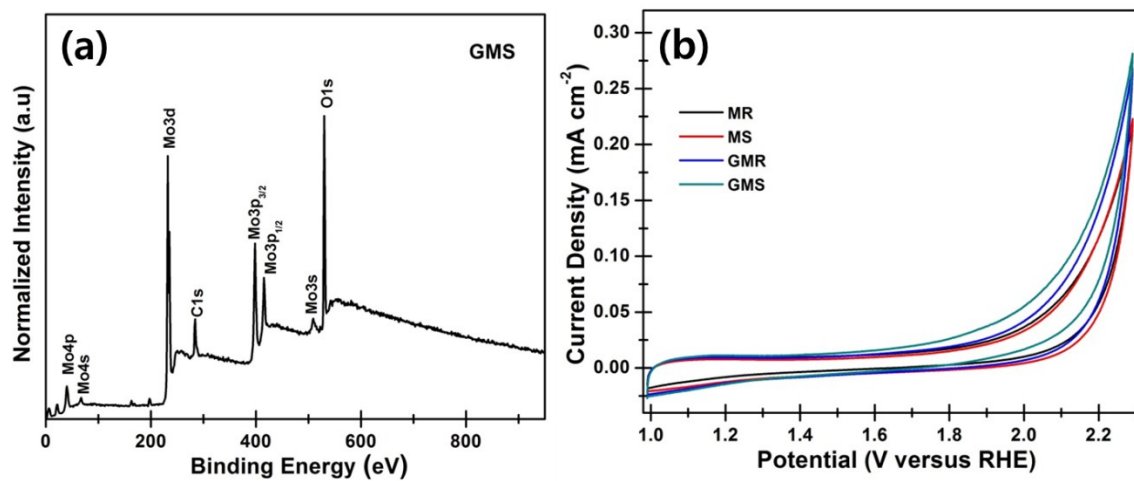

**Fig. S3** (a) XPS analysis of GMS hybrid sample and (b) Oxygen evolution CV curves of all prepared samples in 0.1 M KOH with a sweep rate of  $10 \text{ mV s}^{-1}$ .

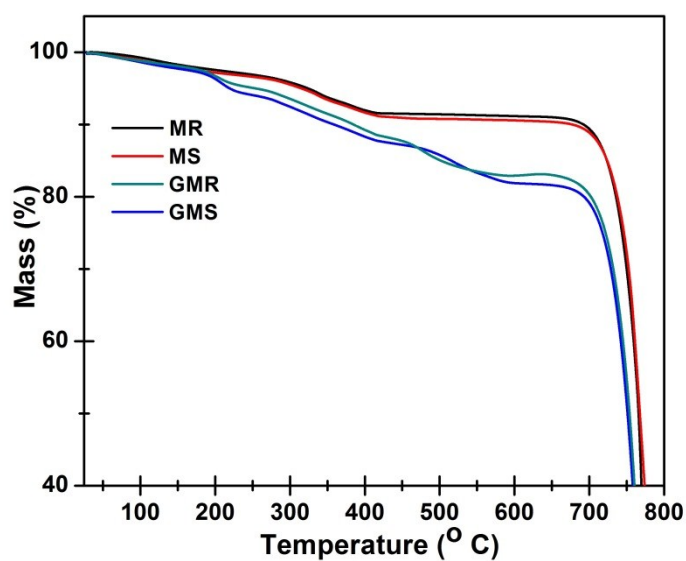

**Fig. S4** TGA analysis of prepared samples

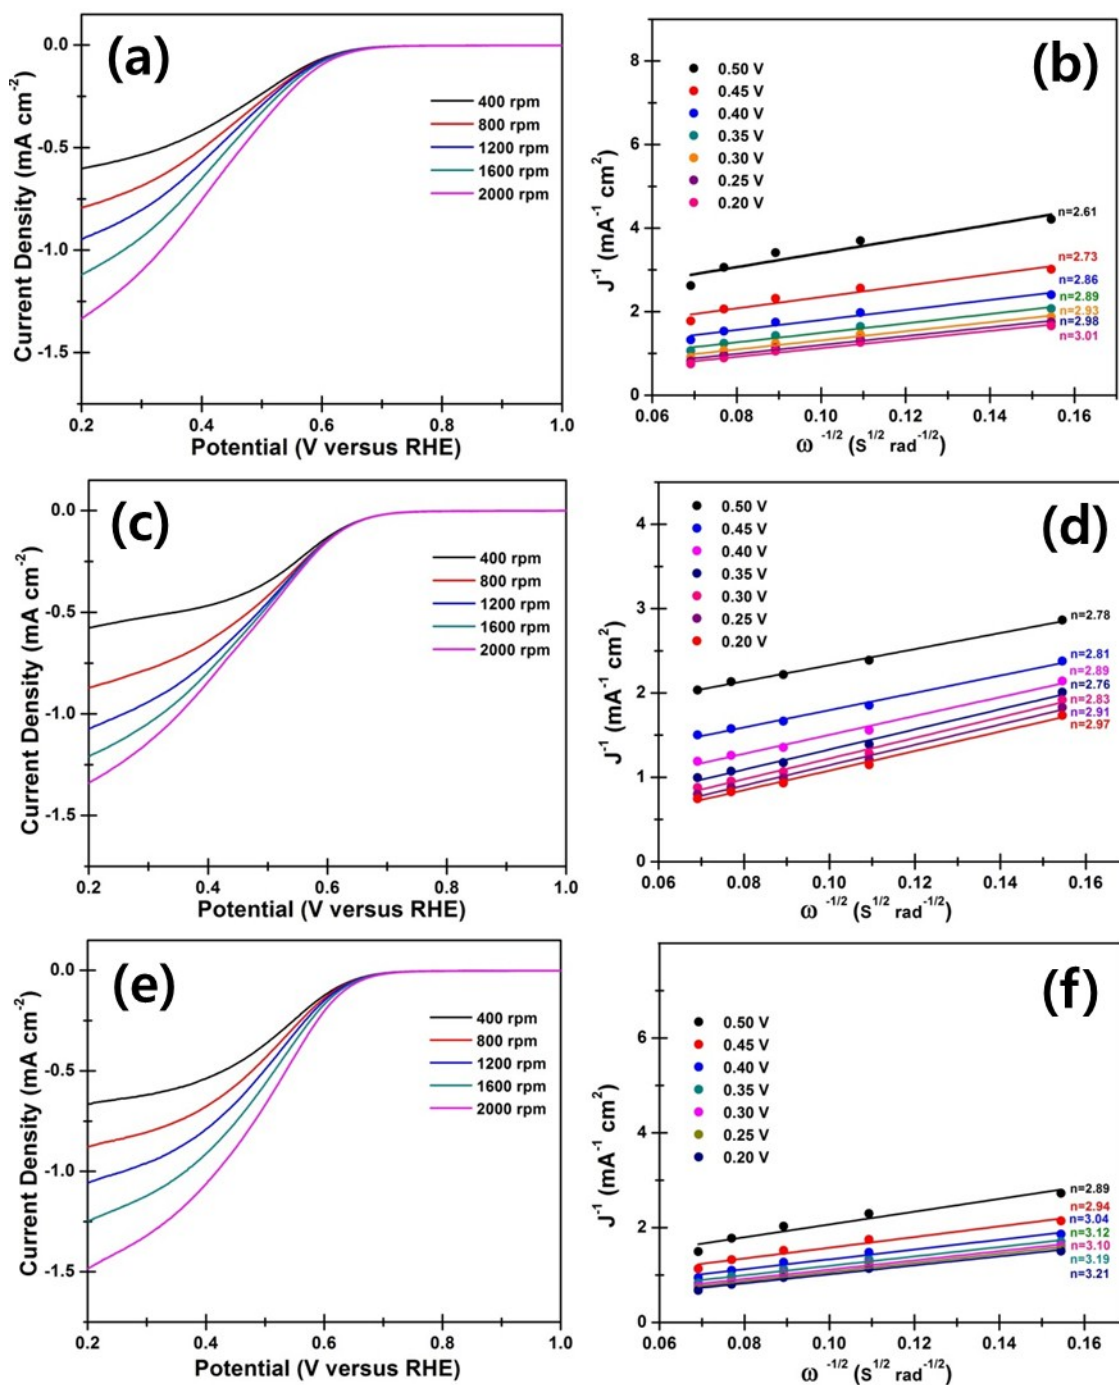

**Fig. S5** Rotating-disk voltammograms of (a, c and e) MR, GMR and MS samples in an O<sub>2</sub>-saturated 0.1 M KOH with a sweep rate of 10 mV s<sup>-1</sup> at various rotation speeds indicated. (b, d and f) show corresponding Koutecky–Levich plots ( $J^{-1}$  versus  $\omega^{-0.5}$ ) at different potentials.

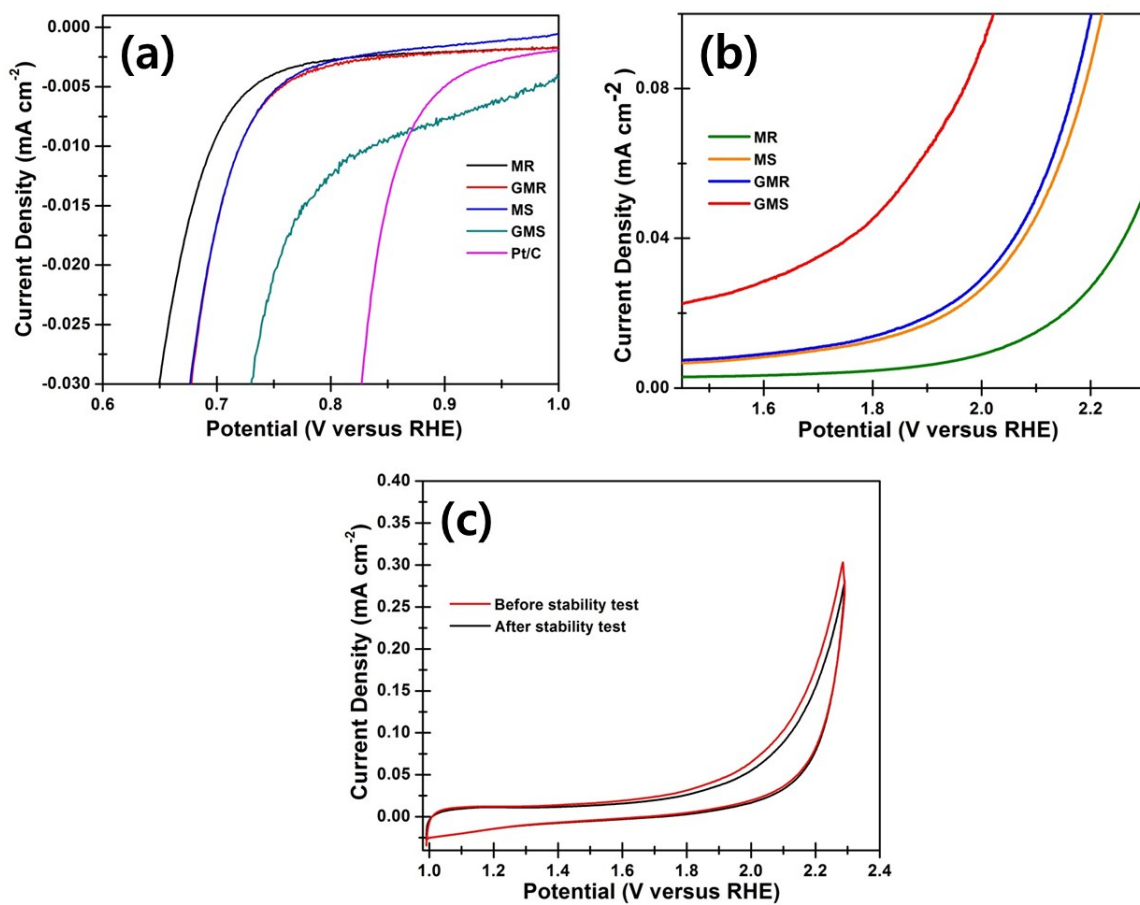

**Fig. S6** One set potentials during (a) Oxygen Reduction Reaction (b) Oxygen Evolution Reactions and (c) CV curves of before and after durability test for GMS hybrid sample.

**Table S1.** Summarized electrochemical parameters of some previously reported high performance ORR and OER catalysts

| Catalyst                                                                                                                                                                                                                                                                          | ORR onset potential (V vs RHE)       | Tafel slope | OER onset potential (V vs RHE)       | Tafel slope |
|-----------------------------------------------------------------------------------------------------------------------------------------------------------------------------------------------------------------------------------------------------------------------------------|--------------------------------------|-------------|--------------------------------------|-------------|
| H <sub>2</sub> -CoCat<br><i>Cobo et al. in Nature Materials</i> <sup>1</sup>                                                                                                                                                                                                      | -                                    | -           | 1.775                                | -           |
| GO (8 wt.%) Cu-MOF<br><i>Jahan et al. in Advanced Functional Materials</i> <sup>2</sup>                                                                                                                                                                                           | 0.29                                 | 69          | 1.19                                 | 65          |
| CG-CoO<br><i>Shun Mao et al. in Energy and Environmental science</i> <sup>3</sup>                                                                                                                                                                                                 | 0.86                                 | 56          | -                                    | 75          |
| Co <sub>3</sub> O <sub>4</sub> -RGO<br><i>Yongye Liang et al. in Nature Materials</i> <sup>4</sup>                                                                                                                                                                                | 0.88                                 | 50          | 1.54                                 | 68          |
| Co <sub>3</sub> O <sub>4</sub> /2.7Co <sub>2</sub> MnO <sub>4</sub><br>Co <sub>3</sub> O <sub>4</sub><br>Co <sub>2</sub> MnO <sub>4</sub><br>Co <sub>3</sub> O <sub>4</sub> + Co <sub>2</sub> MnO <sub>4</sub><br>20 wt% Pt/C<br><i>B. B. Li et al. in Nanoscale</i> <sup>5</sup> | 0.68<br>0.49<br>0.59<br>0.55<br>0.80 | -           | 1.77<br>1.83<br>1.92<br>1.86<br>2.08 | -           |
| Commercial MoO <sub>2</sub><br><i>B. B. Li et al. in Nanoscale</i> <sup>6</sup>                                                                                                                                                                                                   | -                                    | -           | 1.63                                 | -           |
| 20 wt % Ir/C<br>20 wt % Ru/C<br>Mn oxide<br><i>Yelena Gorlin et al. in Journal of American Chemical Society</i> <sup>7</sup>                                                                                                                                                      | 0.69<br>0.61<br>0.73                 | -           | 1.61<br>1.62<br>1.77                 | -           |
| Co <sub>1-x</sub> S/rGO<br><i>Hailiang Wang et al. in Angewandte Chemie International Edition</i> <sup>8</sup>                                                                                                                                                                    | 0.73                                 | -           | -                                    | -           |
| Graphene-Co <sub>3</sub> O <sub>4</sub><br><i>Yufei Zhao et al in Scientific Reports</i> <sup>9</sup>                                                                                                                                                                             | -                                    | -           | 0.446 V vs. Ag/AgCl                  | 67          |
| NG-NiCo<br><i>Sheng Chen et al. ACS Nano</i> <sup>10</sup>                                                                                                                                                                                                                        | -                                    | -           | 0.340 V vs. Ag/AgCl                  | -           |
| Mn <sub>x</sub> O <sub>y</sub> /NC<br>Ni <sub>x</sub> O <sub>y</sub> /NC<br>Co <sub>3</sub> O <sub>4</sub><br><i>Justus Mas et al. in Angewandte Chemie International Edition</i> <sup>11</sup>                                                                                   | 0.81<br>0.71<br>0.27                 | -           | 1.68<br>1.64<br>1.68                 | -           |
| GMS<br><i>This work</i>                                                                                                                                                                                                                                                           | 0.754                                | 56          | 1.768                                | 47          |

This overall summarized results showing that the electrocatalytic performance of our GMS hybrid catalyst toward ORR and OER are comparable and even better than some of the best bi-functional catalysts previously reported.



## References

- [1] S. Cobo, J. Heidkamp, P.-A. Jacques, J. Fize, V. Fourmond, L. Guetaz, B. Jusselme, V. Ivanova, H. Dau and S. Palacin, *Nat. Mater.*, 2012, **11**, 802.
- [2] M. Jahan, Z. Liu and K. P. Loh, *Adv. Funct. Mater.*, 2013, **23**, 5363.
- [3] S. Mao, Z. Wen, T. Huang, Y. Hou and J. Chen, *Energy Environ. Sci.*, 2014, **7**, 609.
- [4] Y. Liang, Y. Li, H. Wang, J. Zhou, J. Wang, T. Regier and H. Dai, *Nat. Mater.*, 2011, **10**, 780.
- [5] D. Wang, X. Chen, D. G. Evans and W. Yang, *Nanoscale*, 2013, **5**, 5312-5315.
- [6] B. Li, Y. Liang, X. Yang, Z. Cui, S. Qiao, S. Zhu, Z. Li and K. Yin, *Nanoscale*, 2015, **7**, 16704.
- [7] Y. Gorlin and T. F. Jaramillo, *J. Am. Chem. Soc.*, 2010, **132**, 13612.
- [8] H. Wang, Y. Liang, Y. Li and H. Dai, *Angew. Chem., Int. Ed.*, 2011, **50**, 10969.
- [9] Y. Zhao, S. Chen, B. Sun, D. Su, X. Huang, H. Liu, Y. Yan, K. Sun and G. Wang, *Sci. Rep.*, 2015, **5**, 07629.
- [10] S. Chen and S.-Z. Qiao, *ACS Nano*, 2013, **7**, 10190.
- [11] J. Masa, W. Xia, I. Sinev, A. Zhao, Z. Sun, S. Grützke, P. Weide, M. Muhler and W. Schuhmann, *Angew. Chem., Int. Ed.*, 2014, **53**, 8508.
